# Supplementary material for: A low-cost and one-step synthesis of a novel hierarchically porous Fe3O4/C composite with exceptional porosity and superior Li+ storage performance
Source: Royal Society of Chemistry journal article supplement (doi:10.1039/c5ra24166a), 2015-01-01
Supplement: c5ra24166a1.pdf [file c5ra24166a1.pdf]

## Supporting information

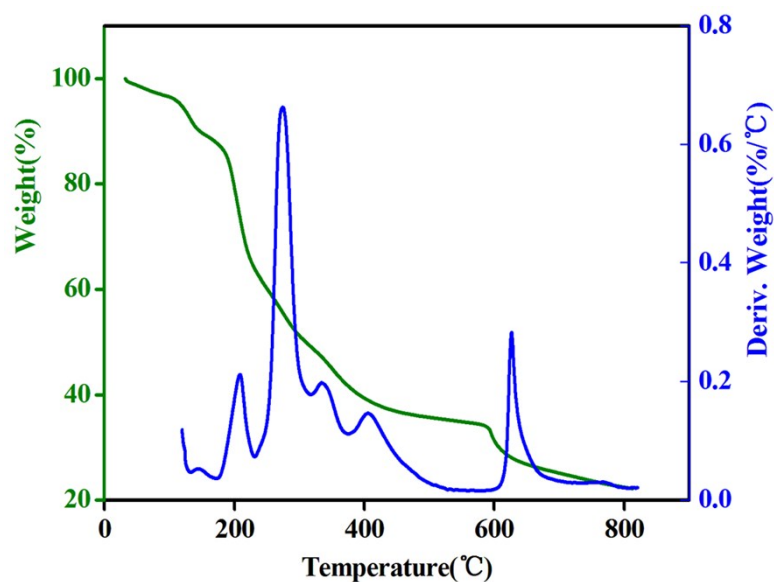

Fig. S1 TG and DSC curves of ferrous gluconate.

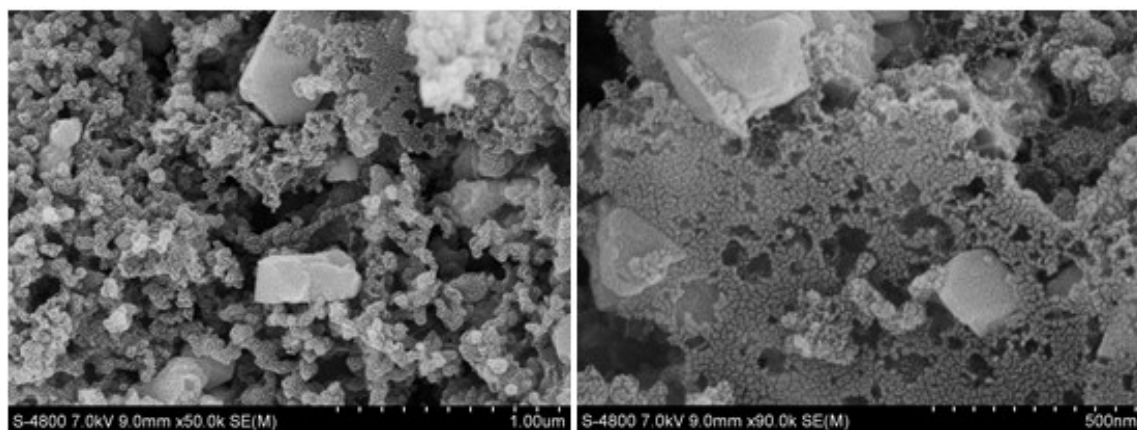

Fig.S2 SEM image of the prepared electrode film on the copper foil

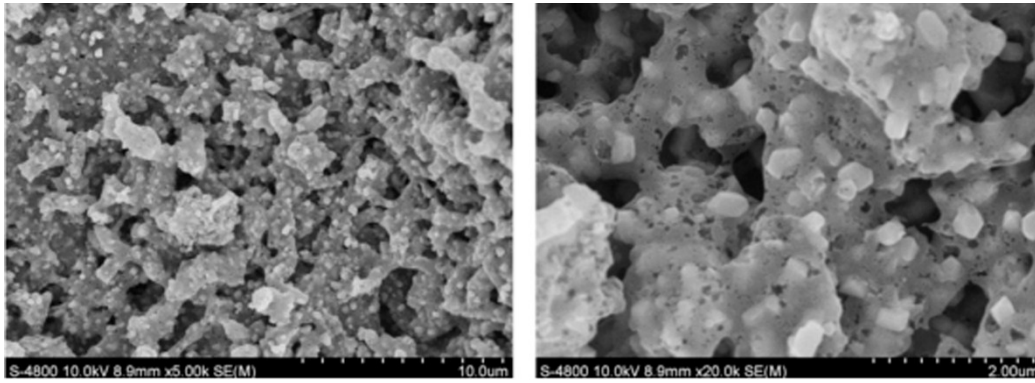

Fig.S3 SEM images of the  $\text{Fe}_3\text{O}_4$  arrangement in hierarchical porous carbon.

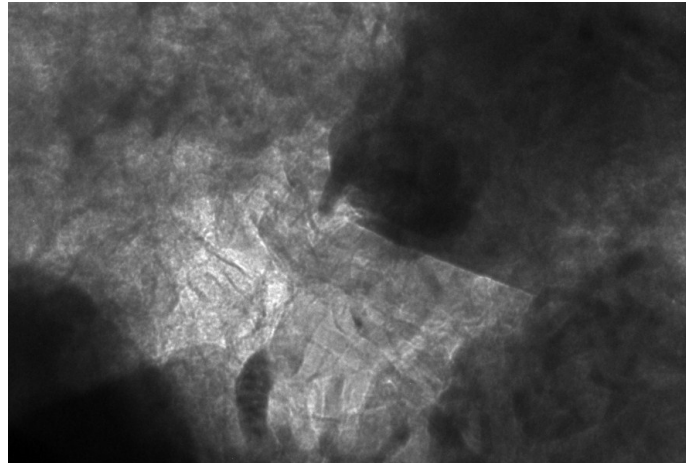

Fig.S4 TEM image of the as-obtained  $\text{Fe}_3\text{O}_4@$ HPC composites, displaying the porous carbon among  $\text{Fe}_3\text{O}_4$  nanoparticles.

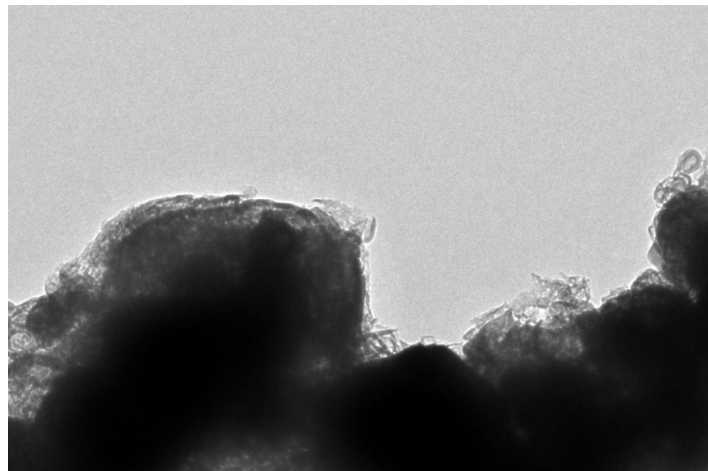

Fig.S5 The low-magnification TEM of the as-obtained  $\text{Fe}_3\text{O}_4@$ HPC composites.

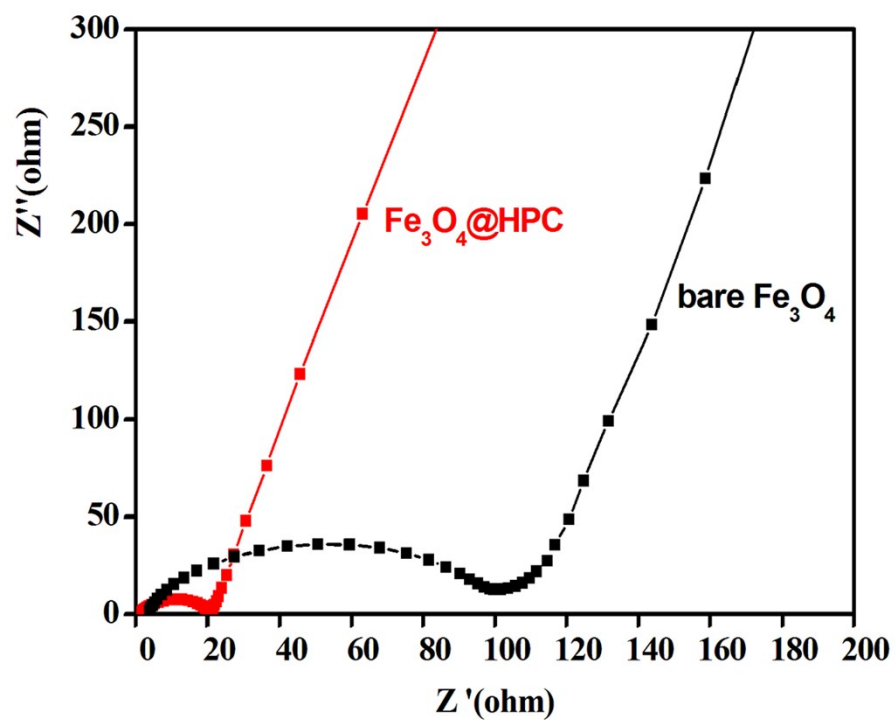

Fig.S6 The electrochemical impedance spectra (EIS) comparison between Fe<sub>3</sub>O<sub>4</sub>@HPC and bare Fe<sub>3</sub>O<sub>4</sub> electrodes.
